# Supplementary material for: Simulation of Dynamic Evolution of Ring Current Ion Flux by a Lunar Base Energetic Neutral Atom (ENA) Imaging
Source: MDPI journal article supplement (doi:10.3390/astronomy2030011), 2023-08-22
Supplement: s1 [file s1]

Archive with 1 entries (1 files):
- astronomy-2416748-supplementary.pdf
