# Supplementary material for: Simulation of Dynamic Evolution of Ring Current Ion Flux by a Lunar Base Energetic Neutral Atom (ENA) Imaging
Source: MDPI journal article supplement (doi:10.3390/astronomy2030011), 2023-08-22
Supplement: s1 [file s1 › astronomy-2416748-supplementary.pdf]

Tables of Lu et al. [21] show the event time sequence during substorms.

**Table 51** Time sequence of various events during the 0736 UT substorm

| UT   | Spacecraft/instrument | Local time | Descriptions of observational events                           | Reference |
|------|-----------------------|------------|----------------------------------------------------------------|-----------|
| 0703 | LANL 84/SOPA          | 20:00      | Proton fluxes (50–400 keV) start decreasing                    | Figure 9  |
| 0704 | Goes12/M-meter        | 02:06      | Magnetic field lines stretch tailward                          | Figure 8  |
| 0714 | Goes10/M-meter        | 22:04      | Magnetic field lines stretch tailward                          | Figure 8  |
| 0722 | TC-2/NUADU            | Global     | Ring current ion fluxes begin increasing                       | Figure 6  |
| 0732 | LANL 84/SOPA          | 20:31      | Proton fluxes(50-400 keV) start increasing                     | Figure 9  |
| 0733 | LANL 84/MPA           | 20:33      | Convective flows turn Earthward                                | Figure 9  |
| 0735 | Goes10/M-meter        | 22:32      | Magnetic field lines show dipolarization                       | Figure 8  |
| 0737 | Goes12/M-meter        | 02:28      | Magnetic field lines show dipolarization                       | Figure 8  |
| 0744 | TC-2/NUADU            | Global     | Ring current ion fluxes reach their maximum and start decaying | Figure 6  |
| 0800 | Ground station        |            | Auroral electrojet, AL-index bay                               | Figure 7  |

**Table 52** Time sequence of various events during the 0822 UT substorm

| UT   | Spacecraft /instrument | Local time | Descriptions of observational events                                | Reference |
|------|------------------------|------------|---------------------------------------------------------------------|-----------|
| 0803 | Goes10/M-meter         | 23:01      | Magnetic field lines stretch tailward at about the same time        | Figure 8  |
|      | Goes12/M-meter         | 03:03      |                                                                     |           |
| 0806 | LANL 84/SOPA           | 21:06      | Proton fluxes (50–400 keV) start decreasing                         | Figure 9  |
| 0820 | TC-2/NUADU             | Global     | Ring current ion fluxes begin increasing                            | Figure 6  |
| 0825 | Goes10/M-meter         | 23:36      | Magnetic field lines show depolarization <sup>a)</sup>              | Figure 8  |
| 0826 | Goes12/M-meter         | 03:27      | Magnetic field lines show dipolarization                            | Figure 8  |
| 0836 | LANL-84/MPA            | 21:36      | Convective flows turn earthward                                     | Figure 9  |
| 0840 | LANL 84/SOPA           | 21:29      | Proton fluxes (50–400 keV) show a sharp increase (injection signal) | Figure 9  |
| 0842 | TC-2/NUADU             | Global     | Ring current ion fluxes reach their maximum and start decaying      | Figure 6  |
| 0855 | Ground station         |            | Auroral electrojet, AL-index bay                                    | Figure 7  |

a) Since the growing of  $H_p$  not accompany with  $H_n$  decreasing at 0818 UT, it was not identified as the dipolarization.

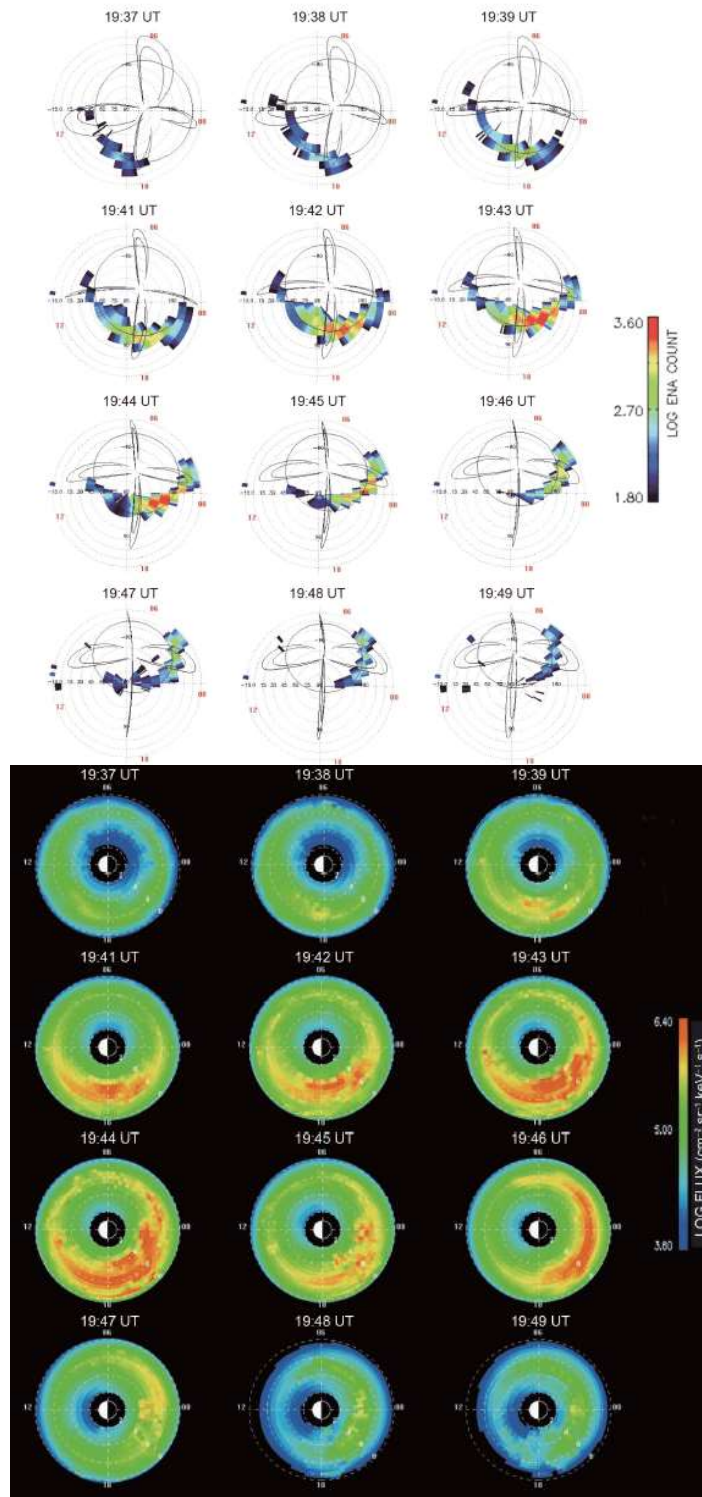

Figure S1. Lu et al.'s [22] evolutionary sequence diagrams show the azimuth drift of the ENA aurora during a substorm.

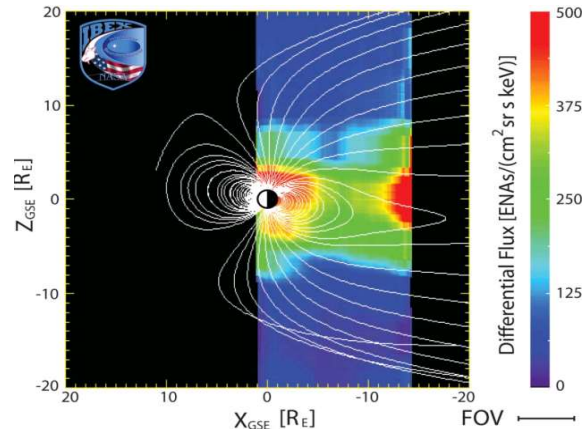

Figure S2. Figure 3 of McComas et al. [10]

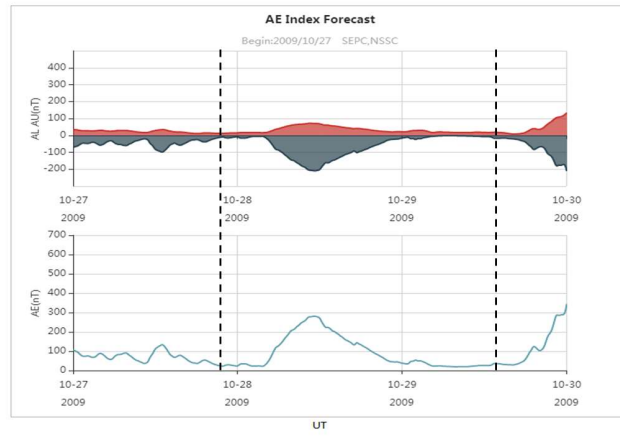

Figure S3. AE index curve of substorm corresponding to magnetotail scanning images of IBEX orbit 51. The region between the two black vertical dotted lines is the sampling period of Figure S2.

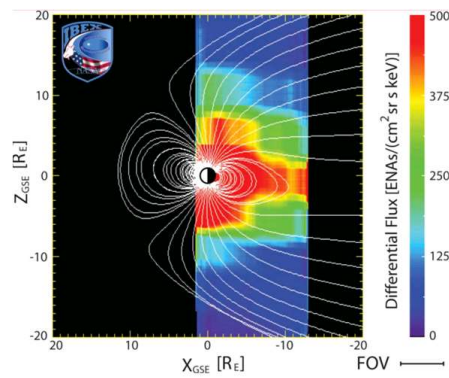

Figure S4. Figure 2 of McComas et al. [10]

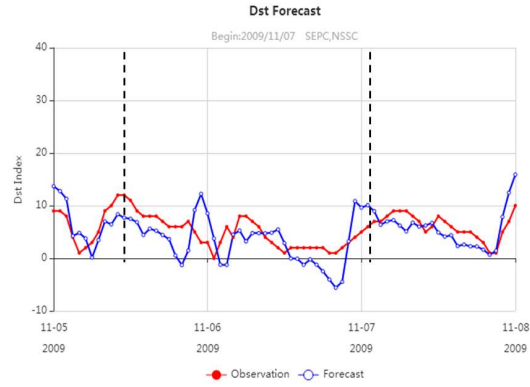

Figure S5. Time-varying curves of Dst index corresponding to ENA scanning images of IBEX orbit 52, where observation in red and forecast in blue (the right panel).

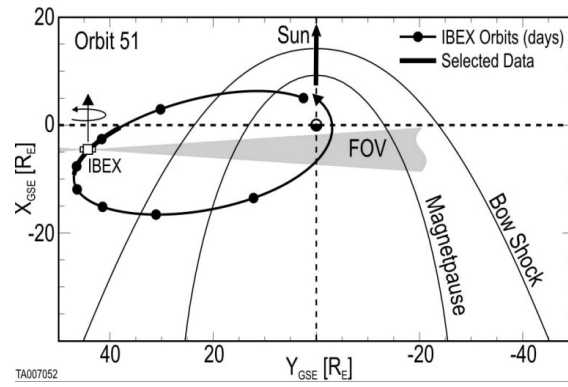

Figure S6. Figure 1 of McComas et al. [10] shows orbital positions with periods of 8 days, where the dates are indicated by black dots.

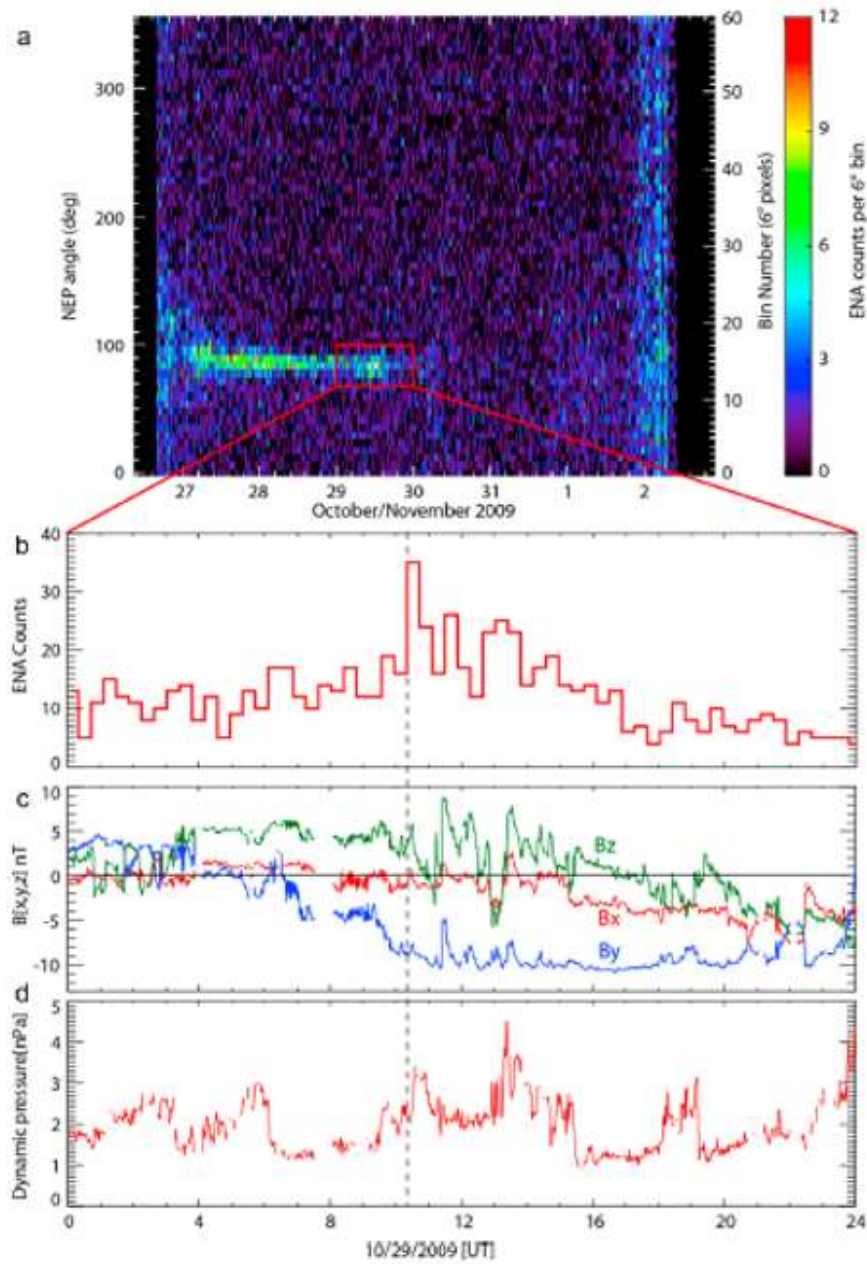

Figure S7. The Figure 4 of McComas et al. [10] shows the raw data. (a) IBEX-Hi energy step 5(2.0-3.8 keCV FWHM) ENA counts for all of IBEX Orbit 51, with the magnetospheric emissions producing the bright band at an NEP angle of  $\sim 90^\circ$ . (b-d) Shown are details from 20 October 2009, when the intensification occurred. Figure 4b gives the integrated counts over  $30^\circ$  inspin phase centered on the magnetotail. Figures 4c and 4d show propagated ACE solar wind parameters for this day.
